# Supplementary material
Source: PubMed Central journal article supplement (PMC6800115)
Supplement: NIHMS1053318-supplement-1.pdf [file NIHMS1053318-supplement-1.pdf]

## SUPPLEMENTARY INFORMATION

### Table of Contents

- 498 • **Table S1 – Primers used in multiplex PCR**
- 499 • **Table S2 – Oligonucleotides used in this study**
- 500 • **Fig S1 – Sequence Alignment of mycobacterial 16S rRNA sequences**
- 501 • **Fig S2 – Representative sequence data for validation of NTM species identification**
- 502 • **Fig S3 – Detection of mixed synthetic analytes with fluorescent BiDz assay**
- 503 • **Fig S4 – Detection of PCR products from mixed templates with fluorescent BiDz assay**
- 504 • **Fig S5 - Detection of mixed synthetic analytes with visual BiDz assay**
- 505 • **Fig S6 – Detection of PCR products from mixed templates with visual BiDz assay**
- 506 • **Fig S7 – Limit of Detection of visual BiDz-NTM assay**

**TABLE S1: Primers used in this study**

| <b>Name</b> | <b>Sequence</b>                              | <b>Product Size</b> |
|-------------|----------------------------------------------|---------------------|
| Myco_16S_F1 | GGCGTGCTTAACACATGCA                          | 230                 |
| Myco_16S_R1 | 5'P-ctggcgcatagctgttctctgtgaCCGGCTACCCGTCGTC |                     |

<sup>a</sup> 5'P indicated the 5' phosphate modification on primers that is used for specific digestion of the antisense strand by  $\lambda$ -exonuclease.

<sup>b</sup> Lowercase letters indicate a linker included on reverse primers to allow dual use of multiplex analytes in an unrelated assay.

**TABLE S2: Oligonucleotides used in this study<sup>a</sup>**

| Name <sup>b</sup>             | Sequence                                                       | [Oligonucleotide] |
|-------------------------------|----------------------------------------------------------------|-------------------|
| Fluorogenic substrate (F-sub) | AAGGT(T-FAM)TCCTC <u>gu</u> CCCTGGGCA-(BHQ)                    | 200 nM            |
| Dz <sub>a</sub> _Mabs         | TGCCCAGGGAGGCTAGCT <sup><i>agtgtgtggctatccggt</i></sup>        | 15 nM             |
| Dz <sub>b</sub> _Mabs         | aaaagctttgaccactcaccatga <u>ACAACGAGAGGAAACCTT</u>             | 15 nM             |
| Dz <sub>a</sub> _Mavi         | TGCCCAGGGAGGCTAGCT <sup><i>gtcttgaggctatccggtat</i></sup>      | 15 nM             |
| Dz <sub>b</sub> _Mavi         | tccaccagaagacatgc <u>ACAACGAGAGGAAACCTT</u>                    | 15 nM             |
| Dz <sub>a</sub> _Mint         | TGCCCAGGGAGGCTAGCT <sup><i>atgcgctaaaggctctat</i></sup>        | 15 nM             |
| Dz <sub>b</sub> _Mint         | aaaagctttccacctaagac <u>ACAACGAGAGGAAACCTT</u>                 | 15 nM             |
| Dz <sub>a</sub> _Mfor         | TGCCCAGGGAGGCTAGCT <sup><i>agcgcgtggctatattcggtattag</i></sup> | 15 nM             |
| Dz <sub>b</sub> _Mfor         | aaaagctttccaccacacaccatga <u>ACAACGAGAGGAAACCTT</u>            | 15 nM             |
| Dz <sub>a</sub> _Mkan         | TGCCCAGGGAGGCTAGCT <sup><i>agtgtgctatccggt</i></sup>           | 15 nM             |
| Dz <sub>b</sub> _Mkan         | gctttccaccacaaggcatgc <u>ccaACAACGAGAGGAAACCTT</u>             | 3 nM              |
| Dz <sub>a</sub> _Mgor         | TGCCCAGGGAGGCTAGCT <sup><i>atgtgtcctgtggctattccggtat</i></sup> | 15 nM             |
| Dz <sub>b</sub> _Mgor         | aaaagctttccaccacaggac <u>ACAACGAGAGGAAACCTT</u>                | 15 nM             |
| Dz <sub>a</sub> _Mtb          | TGCCCAGGGAGGCTAGCT <sup><i>ggtctatccggtattagacc</i></sup>      | 150 nM            |
| Dz <sub>b</sub> _Mtb          | cacaagacatgcatccgt <u>ACAACGAGAGGAAACCTT</u>                   | 150 nM            |
| Mabs                          | <i>ctaataccggataggaccacacactcatggtgagtggtgcaaagctttt</i>       | 1 nM              |
| Mavi                          | <i>ctaataccggataggacctcaagacgcatgtcttctgtggaaagctttt</i>       | 1 nM              |
| Mint                          | <i>ctaataccggataggaccttaggcgcatgtcttttaggtgaaagctttt</i>       | 1 nM              |
| Mfor                          | <i>ctaataccgaatatgaccacgcctcatggtgtgtggtgaaagctttt</i>         | 1 nM              |
| Mkan                          | <i>ctaataccggataggaccacttggcgcgcatgccttgtggtgaaagctttt</i>     | 1 nM              |
| Mgor                          | <i>ctaataccgaataggaccacaggacacatgtcctgtggtgaaagctttt</i>       | 1 nM              |
| Mtb                           | <i>actgggtctaataccggataggaccacgggatgcatgtcttgtggtgaa</i>       | 1 nM              |
| IPDz substrate                | GGGTAGGGCGGGTTGGGTT <u>Cgu</u> CCATGAGCAACTCGCCC               | 1000 nM           |
| vDz <sub>a</sub> _Mabs        | gcaccactcaccatg <u>ACAACGAGAACCCAACC</u>                       | 30 nM             |
| vDz <sub>b</sub> _Mabs        | GTTGTCATGGAGGCTAGCT <sup><i>aatgtgtggctatcc</i></sup>          | 100 nM            |
| vDz <sub>a</sub> _Mavi        | ccaccagaagacatg <u>ACAACGAGAACCCAACC</u>                       | 30 nM             |
| vDz <sub>b</sub> _Mavi        | GTTGTCATGGAGGCTAGCT <sup><i>cgcttgaggctatc</i></sup>           | 100 nM            |
| vDz <sub>a</sub> _Mint        | ctttccacctaagacatg <u>ACAACGAGAACCCAACC</u>                    | 30 nM             |
| vDz <sub>b</sub> _Mint        | GTTGTCATGGAGGCTAGCT <sup><i>cgcttaaaggctctatc</i></sup>        | 100 nM            |
| vDz <sub>a</sub> _Mfor        | ctttccaccacacaccatg <u>ACAACGAGAACCCAACC</u>                   | 30 nM             |
| vDz <sub>b</sub> _Mfor        | GTTGTCATGGAGGCTAGCT <sup><i>aagcgcgtgctatcc</i></sup>          | 100 nM            |
| vDz <sub>a</sub> _Mkan        | ccaccacaaggcatg <u>ACAACGAGAACCCAACC</u>                       | 30 nM             |
| vDz <sub>b</sub> _Mkan        | GTTGTCATGGAGGCTAGCT <sup><i>cgccaagtgtgctatc</i></sup>         | 100 nM            |
| vDz <sub>a</sub> _Mgor        | aagctttccacc <u>ACAACGAGAACCCAACC</u>                          | 30 nM             |
| vDz <sub>b</sub> _Mgor        | GTTGTCATGGAGGCTAGCT <sup><i>aggacatgtgtcctgtggt</i></sup>      | 100 nM            |
| vDz <sub>a</sub> _Mtb         | ctttccaccacaagacatg <u>ACAACGAGAACCCAACC</u>                   | 30 nM             |
| vDz <sub>b</sub> _Mtb         | GTTGTCATGGAGGCTAGCT <sup><i>catcccgtgtgctatcc</i></sup>        | 100 nM            |
| vMabs                         | <i>ctaataccggataggaccacacactcatggtgagtggtgcaaagctttt</i>       | 100 nM            |
| vMavi                         | <i>ctaataccggataggacctcaagacgcatgtcttctgtggaaagctttt</i>       | 100 nM            |
| vMint                         | <i>ctaataccggataggaccttaggcgcatgtcttttaggtgaaagctttt</i>       | 100 nM            |
| vMfor                         | <i>ctaataccgaatatgaccacgcctcatggtgtgtggtgaaagctttt</i>         | 100 nM            |
| vMkan                         | <i>ctaataccggataggaccacttggcgcgcatgccttgtggtgaaagctttt</i>     | 100 nM            |
| vMgor                         | <i>ctaataccgaataggaccacaggacacatgtcctgtggtgaaagctttt</i>       | 100 nM            |
| vMtb                          | <i>ctaataccggataggaccacgggatgcatgtcttgtggtgaaagcgtt</i>        | 100 nM            |

<sup>a</sup> Formatting: the portion of the Dz sensor complementary to the 5' end of the analyte is in italics; the portion of the sensor complementary to the 3' end of the analyte and analyte sequences are in lowercase; sequences complementary to F-sub or IPDz are UPPERCASE; parts of Dz catalytic core are UNDERLINED. The portions of synthetic DNA analytes not complementary to vBiDz are in lowercase grey. The fragment of IPDz responsible for signal generation is in UPPERCASE grey

<sup>b</sup> All oligonucleotides which begin with the gene name are synthetic DNA analytes.

```

*           *           *           *           *           *           *           *           *
M. abs  1>GGCGTGCTTAACACA TGCAAGTCGAACGGAAAGGCC-C-TTC-GG-GGTACTCGAGTGGCGAACGGGTGAGTAACACGTGGGTGATCTGCCCTGCAC-TC>95
M. for  1>GGCGTGCTTAACACA TGCAAGTCGAACGGAAAGGCC-C-TTC-GG-GGTACTCGAGTGGCGAACGGGTGAGTAACACGTGGGTGATCTGCCCTGCAC-TT>95
M. kan  1>GGCGTGCTTAACACA TGCAAGTCGAACGGAAAGGTCTC-TTC-GGAGACACTCGAGTGGCGAACGGGTGAGTAACACGTGGGCAATCTGCCCTGCAC-AC>97
M. gor  1>GGCGTGCTTAACACA TGCAAGTCGAACGGTAAGGCC-C-TTC-GG-GNTACACGAGTGGCGAACGGGTGAGTAACACGTGGGTAATCTGCCCTGCACATC>96
M. avi  1>GGCGTGCTTAACACA TGCAAGTCGAACGGAAAGGCCCTC-TTC-GGAGGTACTCGAGTGGCGAACGGGTGAGTAACACGTGGGCAATCTGCCCTGCAC-TT>97
M. int  1>GGCGTGCTTAACACA TGCAAGTCGAACGGAAAGGCC-CCTTCGGG-GGTACTCGAGTGGCGAACGGGTGAGTAACACGTGGGCAATCTGCCCTGCAC-TT>97
M. tb   1>GGCGTGCTTAACACA TGCAAGTCGAACGGAAAGGTCTC-TTC-GGAGATACTCGAGTGGCGAACGGGTGAGTAACACGTGGGTGATCTGCCCTGCAC-TT>97

*           *           *           *           *           *           *           *           *
M. abs  96>TGGGATAAGCCTGGGAAACTGGGTCTAATACCGGATAGGACCAC-A-CACTTCATGGTGAGT-GGTGCAAA--GCTTTTGCGGTGTGGGATGAGCCCGCG>190
M. for  96>TGGGATAAGCCTGGGAAACTGGGTCTAATACCGAATATGACCAC-G-CGCTTCATGGTGTGT-GGTGGAAA--GCTTTTGCGGTGTGGGATGGGCCCGCG>190
M. kan  98>CGGGATAAGCCTGGGAAACTGGGTCTAATACCGGATAGGACCAC-T-TGGCGCATGCCTTGT-GGTGGAAA--GCTTTTGCGGTGTGGGATGGGCCCGCG>192
M. gor  97>-GGGATAAGCCTGGGAAACTGGGTCTAATACCGAATAGGACCAC-AGGAC-ACATGTCTTGT-GGTGGAAA--GCTTTTGCGGTGTGGGATGGGCCCGCG>190
M. avi  98>CGGGATAAGCCTGGGAAACTGGGTCTAATACCGGATAGGACCTCAA-GAC-GCATGTCTTCT-GGTGGAAA--GCTTTTGCGGTGTGGGATGGGCCCGCG>192
M. int  98>CGGGATAAGCCTGGGAAACTGGGTCTAATACCGGATAGGACCTTTA-GGC-GCAT-GTCTTTAGGTGGAAA--GCTTTTGCGGTGTGGGATGGGCCCGCG>192
M. tb   98>CGGGATAAGCCTGGGAAACTGGGTCTAATACCGGATAGGACCAC-G-GGATGCATGTCTTGT-GGTGGAAAGCGCTTTAGCGGTGTGGGATGAGCCCGCG>194

*           *           *           *           *           *
M. abs  191>GCCTATCAGCTTGTGGTGGGGTAATGGCCACCAAGGC GACGACGGGTAGCCGG>245
M. for  191>GCCTATCAGCTTGTGGTGGGGTAATGGCCACCAAGGC GACGACGGGTAGCCGG>245
M. kan  193>GCCTATCAGCTTGTGGTGGGGTGACGGCCTACCAAGGC GACGACGGGTAGCCGG>247
M. gor  191>GCCTATCAGCTTGTGGTGGGGTGATGGCCTACCAAGGC GACGACGGGTAGCCGG>245
M. avi  193>GCCTATCAGCTTGTGGTGGGGTGACGGCCTACCAAGGC GACGACGGGTAGCCGG>247
M. int  193>GCCTATCAGCTTGTGGTGGGGTGATGGCCTACCAAGGC GACGACGGGTAGCCGG>247
M. tb   195>GCCTATCAGCTTGTGGTGGGGTGACGGCCTACCAAGGC GACGACGGGTAGCCGG>249

```

**Figure S1. Sequence Alignment of mycobacterial 16S rRNA sequences.** The purple and orange sequences represent the forward and reverse primer sites, respectively. The blue and green sequences represent the binding site for Dz<sub>a</sub> and Dz<sub>b</sub>, respectively.

M. abs

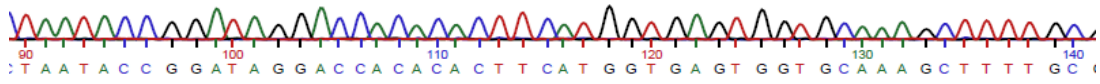

Hypervariable region: positions 95 - 138

M. avi

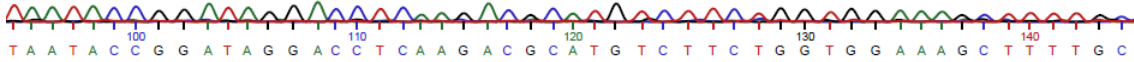

Hypervariable region: positions 96 - 134

M. int

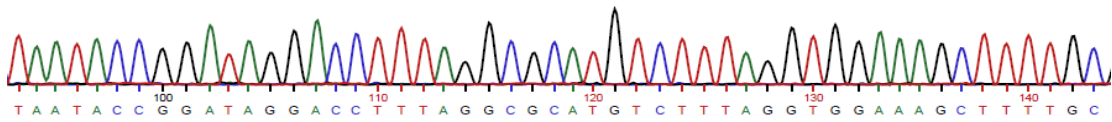

Hypervariable region: positions 102 - 141

M. for

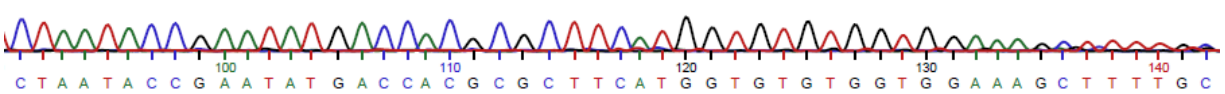

Hypervariable region: positions 91 - 141

**Fig S2.** Representative raw sequencing data for validation of NTM species identification. Similar sequencing reads for all 16S species-specific hypervariable regions targeted by Dz sensors were generated for each NTM sample analyzed.

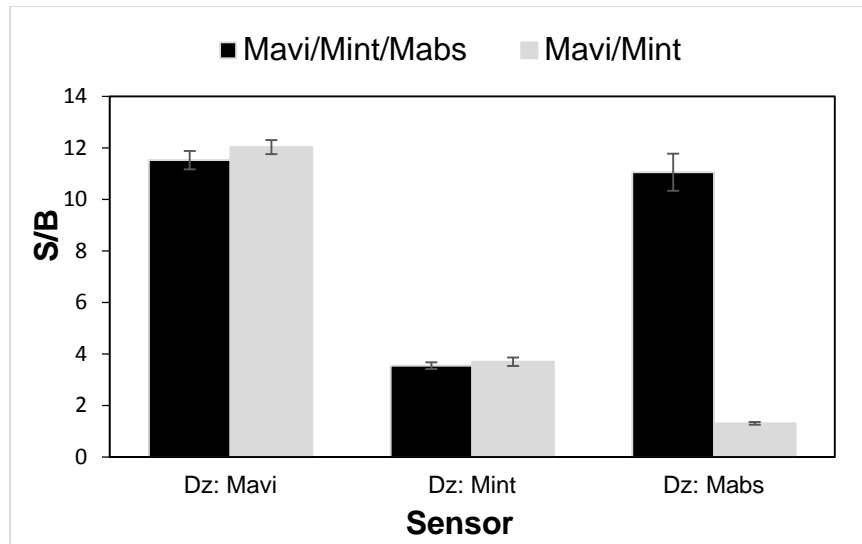

**Fig S3: Detection of mixed synthetic analytes.** Synthetic analytes of the 16s rRNA region for the indicated strains were mixed in equimolar amounts (1nM each) and detected with BiDz sensors: *M. avium*, *M. abscessus*, and *M. intracellulare*. The data shown is the average of four independent measurements. S/B ratio indicates the ratio of the specific Signal (samples containing analytes divided by Background (consisting of Dz master mix of sensors and substrates plus water) Error bars indicate standard deviation.

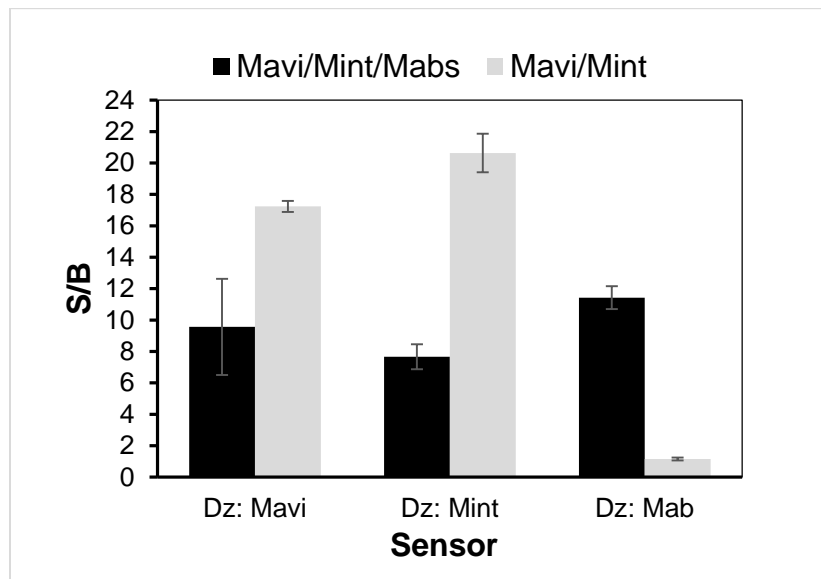

**Fig S4: Detection of PCR analytes from mixed DNA templates.** 16S rRNA PCR products amplified from mixtures of NTM chromosomal DNAs detected with BiDz assay. S/B ratio was calculated using the average of four independent measurements. S/B ratio indicates the ratio of the specific Signal (samples containing analytes divided by Background (consisting of Dz master mix of sensors and substrates plus water) Error bars indicate standard deviation.

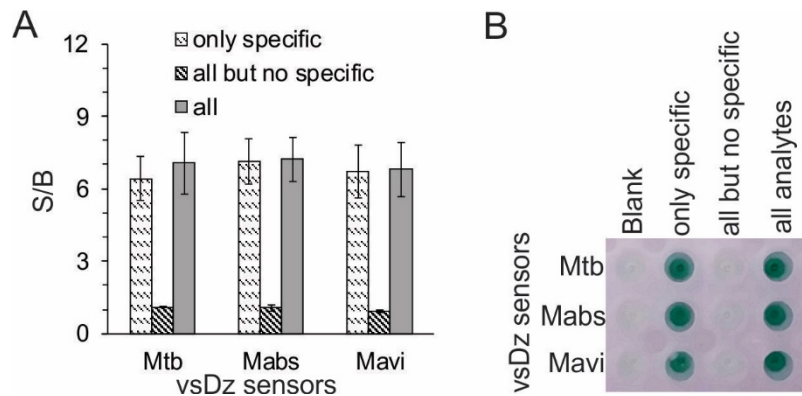

**Fig S5: Performance of vBiDz sensors using individual NTM-mimicking synthetic analytes or their mixtures.** **A.** Signal-to-background ratio (S/B) for the samples containing *Mtb*-, *Mabs*- or *Mavi*-specific vBiDz sensor in the presence of only specific analyte, the mixture of all NTM analytes but the specific one, or the mixture of all NTM analytes including the specific one. The S/B values were calculated as absorbance at 420 nm for the samples divided by the absorbance of the blank (no analyte added). The data is averaged from three independent experiments with a standard deviation as an error bar. **B.** Images of the samples corresponding to panel A in a well-plate.

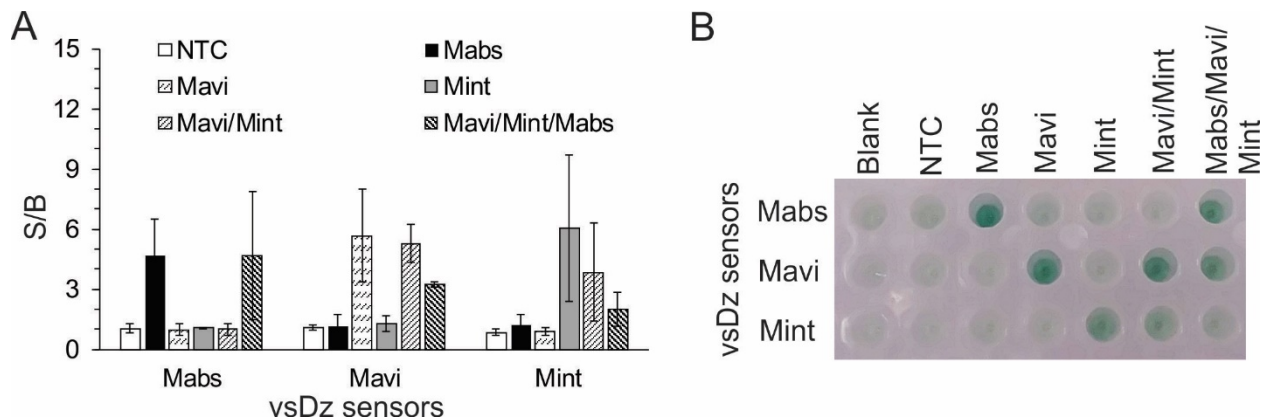

**Fig S6: Performance of vBiDz sensors using fragments of indicated NTM DNA after their PCR amplification (individual or their mixtures).** **A.** Signal-to-background ratio (S/B) for the samples containing *Mabs*-, *Mavi*- or *Mint*-specific vBiDz sensor in the presence of 10% PCR amplicon obtained using either individual DNA from *Mabs*, *Mavi*, or *Mint*; or their mixtures (*Mavi/Mint*; *Mavi/Mint/Mabs*). As a negative control, the sample containing the sensor in the presence of 10% no-target control (NTC) of the PCR reaction were used. The S/B values were calculated as absorbance at 420 nm for the samples divided by the absorbance of the blank (no analyte added). The data is averaged from three independent experiments with a standard deviation as an error bar. **B.** Images of the samples corresponding to panel A in a well-plate.

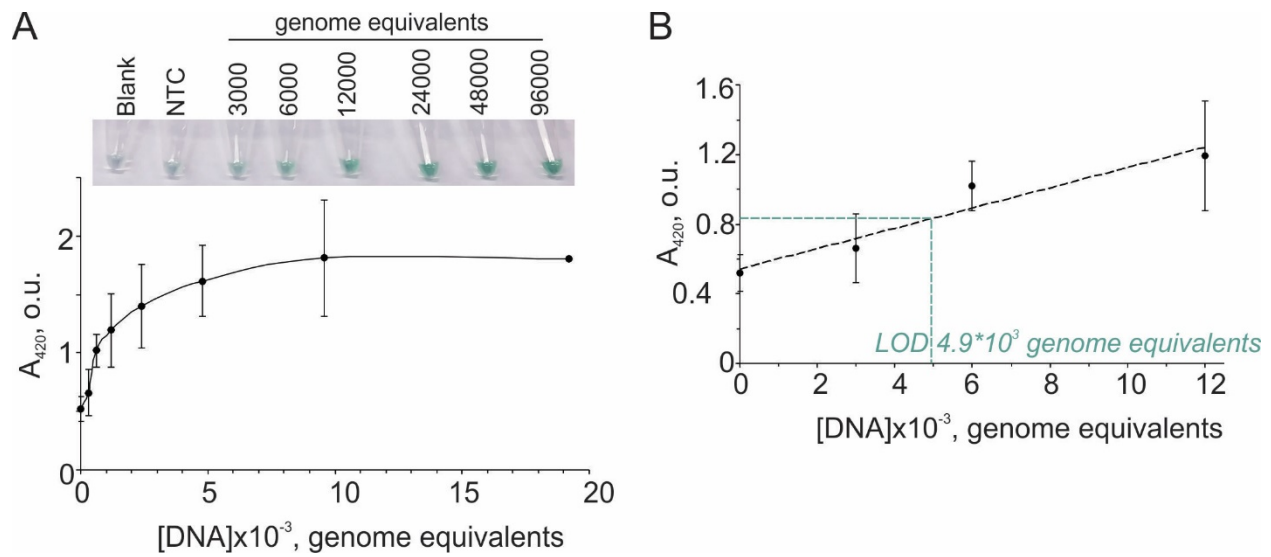

**Fig S7: Dependence of the signal for *Mtb*-specific vBiDz sensor on the target concentration. A.** Absorbance at 420 nm for the samples containing the sensor in the presence of 10% PCR product obtained using different starting concentrations of *Mtb* DNA. Inset: images of the tubes containing the blank sample and the samples corresponding to the data points on the graph. **B.** Calculation of the limit of detection (LOD) using PCR products obtained with 0-12000 *Mtb* genome equivalents in the aliquot (10%) used for the analysis with the vBi-Dz sensor.
